# Supplementary material for: Direct planting of ultrafine MoO2+δ nanoparticles in carbon nanofibers by electrospinning: self-supported mats as binder-free and long-life anodes for lithium-ion batteries
Source: Royal Society of Chemistry journal article supplement (doi:10.1039/c6cp01806h), 2016-01-01
Supplement: c6cp01806h1.pdf [file c6cp01806h1.pdf]

***Electronic Supplementary Information (ESI)***

**Direct planting of ultrafine  $\text{MoO}_{2+\delta}$  nanoparticles in carbon nanofibers by electrospinning: self-supported mats as binder-free and long-life anodes for lithium-ion batteries**

Xiaoxiao Liu, Henghui Xu, Yunhui Huang, Xianluo Hu\*

*State Key Laboratory of Material Processing and Die & Mould Technology, School of Materials Science and Engineering, Huazhong University of Science and Technology, Wuhan 430074, P. R. China*

Corresponding author: Tel. +86 27 87558245.

E-mail address: huxl@mail.hust.edu.cn

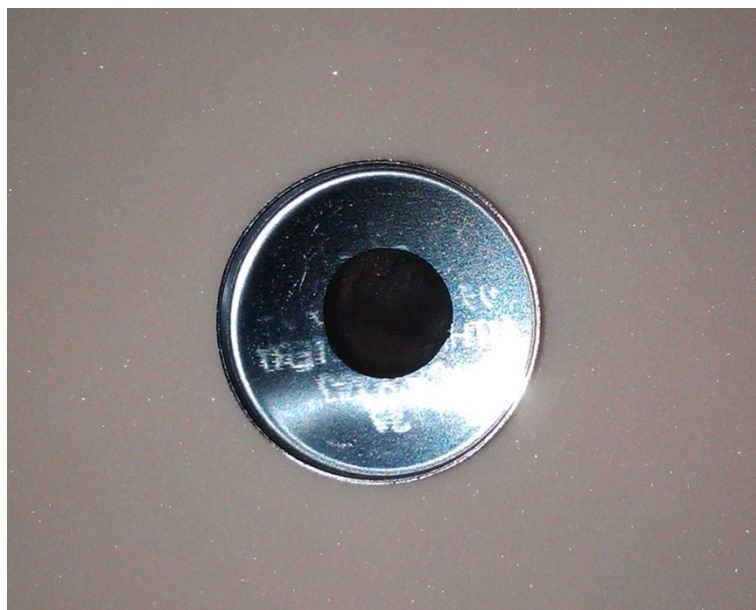

**Fig. S1** Photograph of the fresh binder-free C/MoO<sub>2+ $\delta$</sub>  electrode.

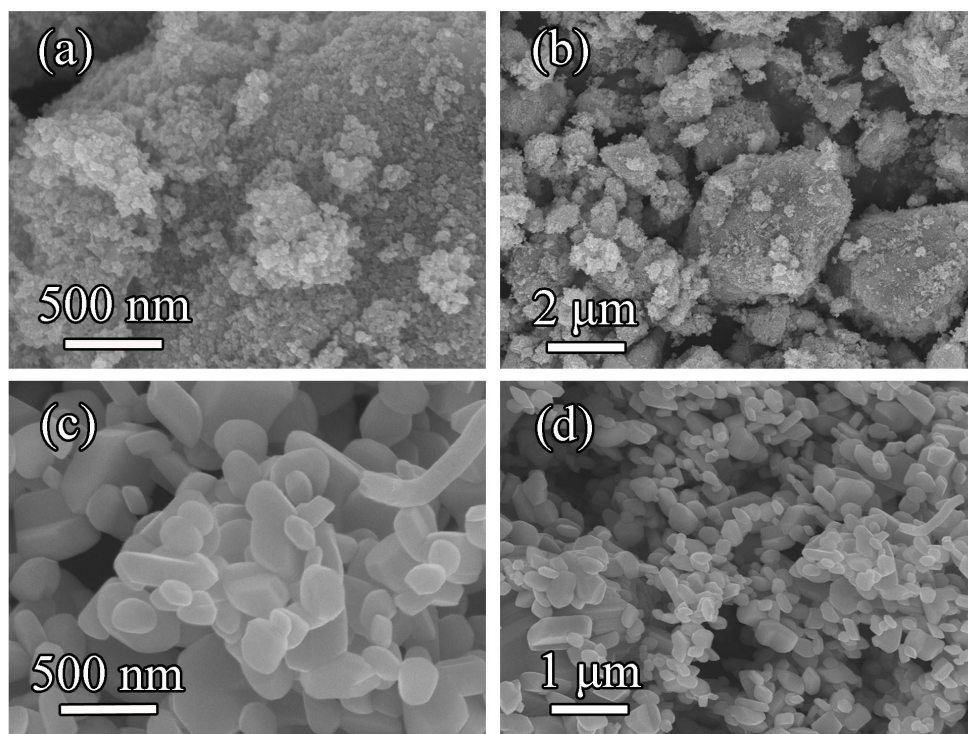

**Fig. S2** SEM images of (a, b) MoO<sub>x</sub> nanoparticles; (c, d) compared particles prepared by heating MoO<sub>x</sub> nanoparticles at 700 °C for 2 h in N<sub>2</sub>.

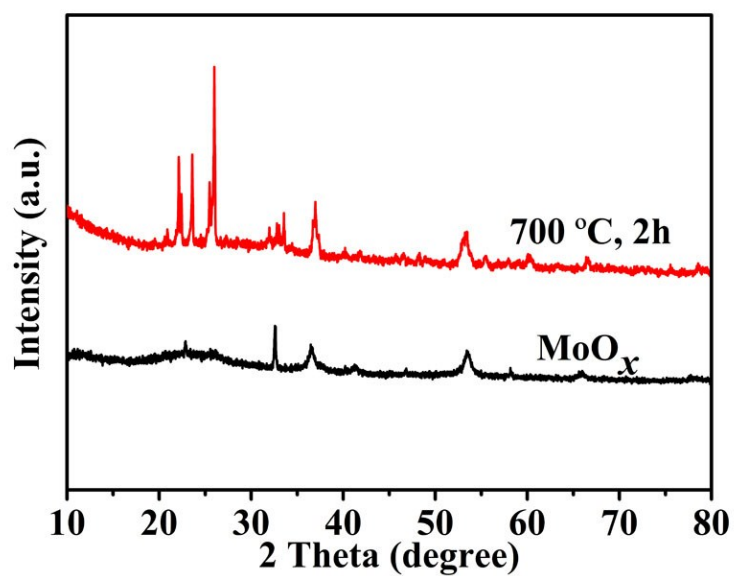

**Fig. S3** XRD patterns of MoO<sub>x</sub> nanoparticles and compared sample prepared by heating MoO<sub>x</sub> at 700 °C for 2 h in N<sub>2</sub>.

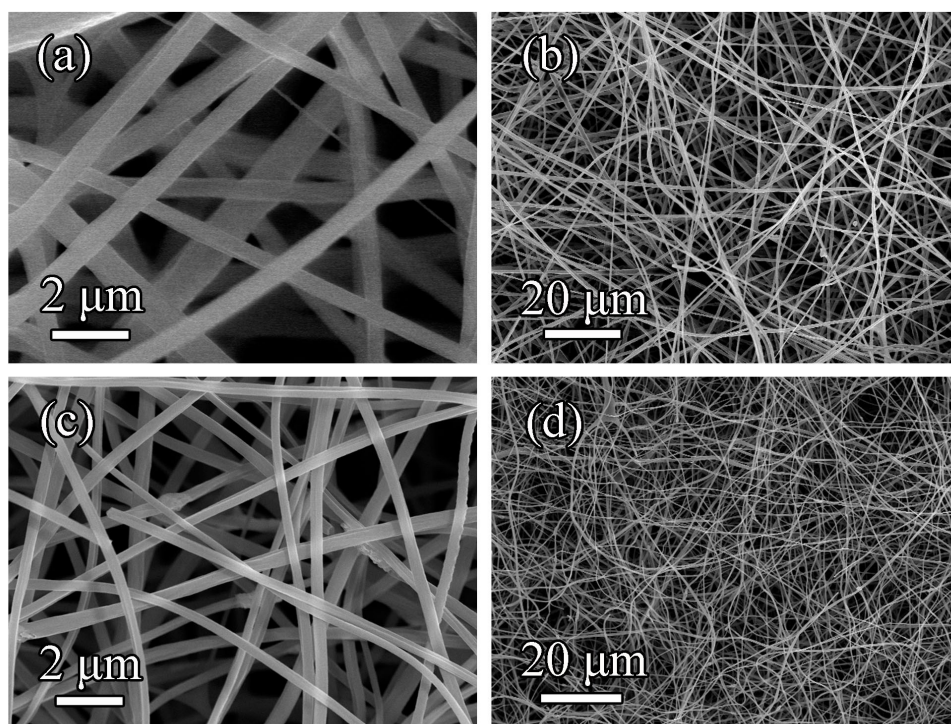

**Fig. S4** M-0.3: SEM images of (a,b) electrospun precursor and (c,d) the obtained nanofibers by treating the precursor at 700 °C for 2 h in N<sub>2</sub>.



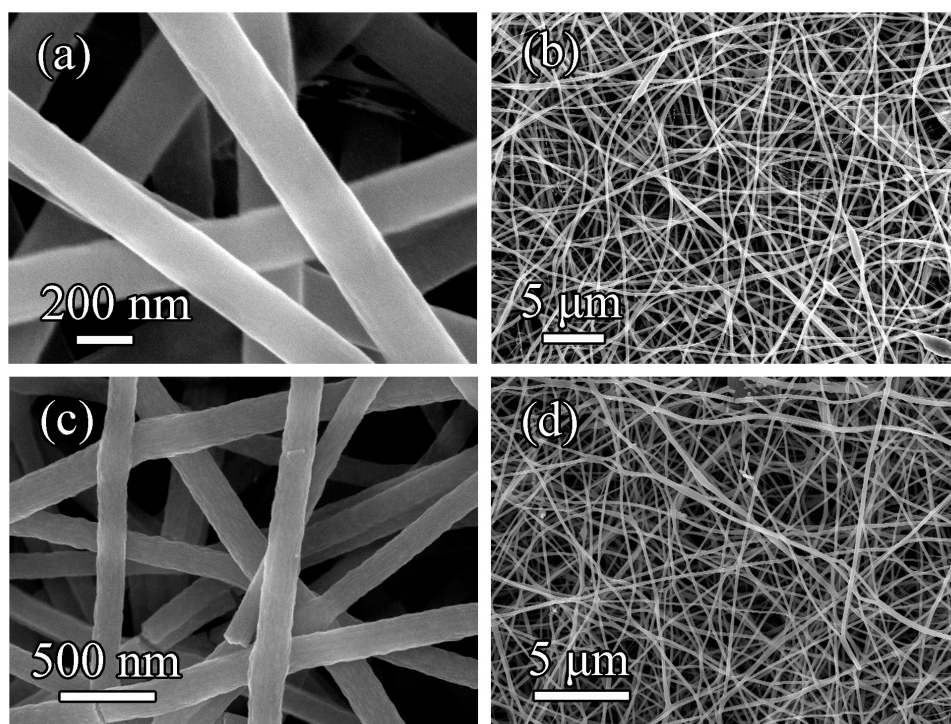

**Fig. S5** M-0.5: SEM images of (a,b) electrospun precursor and (c,d) the obtained nanofibers by treating precursor at 700 °C for 2 h in N<sub>2</sub>.

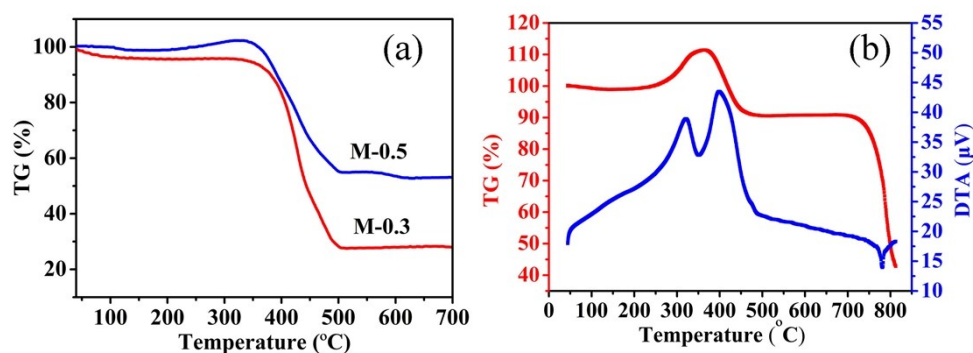

**Fig. S6** (a) TG curves of M-0.5 and M-0.3 nanofibers synthesized by treating precursors at 700 °C for 2 h in N<sub>2</sub>; (b) TG/DTA curves of the as-prepared C/MoO<sub>2+δ</sub> composite nanofibers. (The calculated carbon contents in sample M-0.5 and M-0.3 is 52.5 and 73.2 wt%, respectively). As shown in Fig. S6 (b), the weight change between 200 °C and 600 °C is owing to both the oxidation of MoO<sub>2+δ</sub> and the combustion of carbon. The two exothermic peaks between 260-350 °C and 350-500 °C in the DTA profile can be assigned to the oxidation of MoO<sub>2+δ</sub> and the combustion of the carbon, respectively. While the endothermic peak between 780-820 °C corresponds to the eliquation and volatilization of MoO<sub>3</sub>.

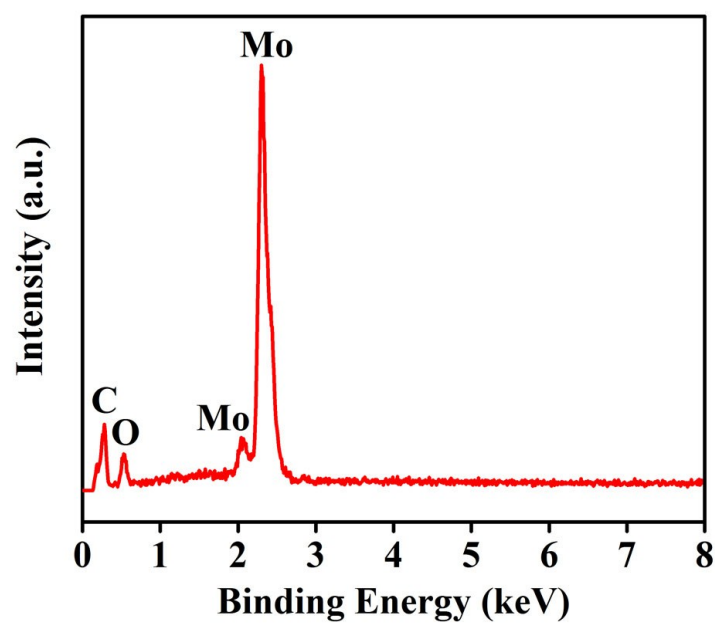

**Fig. S7** EDX spectrum of prepared C/MoO<sub>2+δ</sub> nanofiber composites.

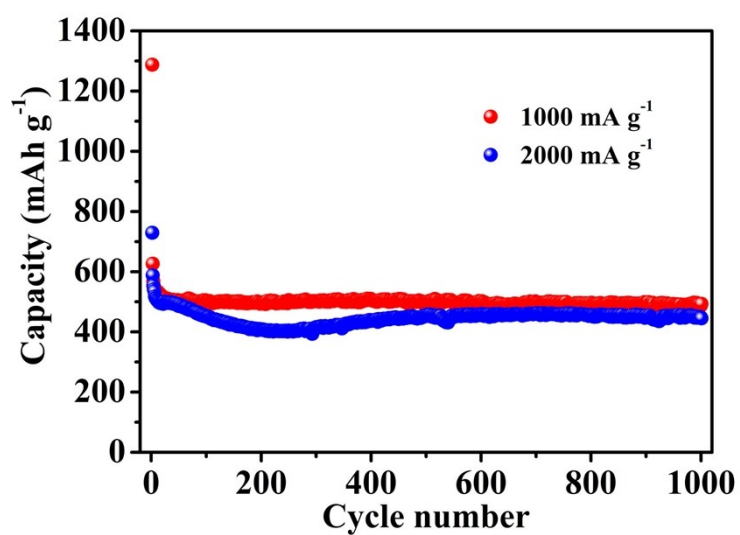

**Fig. S8** Cycling properties of the binder-free C/MoO<sub>2+δ</sub> electrode in the potential range of 3–0.01 V vs. Li/Li<sup>+</sup> at different current densities of 1000 and 2000 mA g<sup>-1</sup>.

**Table S1.** Comparison of battery performance of MoO<sub>x</sub>/C as anode in Li-ion batteries

| Sample                                         | Current density (mA/g)    | Cycle number              | Specific capacity (mAh/g)    | References          |
|------------------------------------------------|---------------------------|---------------------------|------------------------------|---------------------|
| Carbon coated MoO <sub>2</sub>                 | 50                        | 50                        | 762.7                        | 6                   |
| Hierarchical MoO <sub>2</sub> nanoarchitecture | 200                       | 20                        | 719.1                        | 7                   |
| MoO <sub>2</sub> graphene thin film            | 47.8                      | 100                       | 675.9                        | 9                   |
| MoO <sub>2</sub> /MoC heteronanotubes          | 200                       | 140                       | 790                          | 10                  |
| MoO <sub>3-x</sub> nanowire arrays             | 50                        | 20                        | 630                          | 12                  |
| MoO <sub>2</sub> /graphene                     | 500                       | 70                        | 848.6                        | 16                  |
| MoO <sub>2</sub> /C                            | 50                        | 350                       | 734                          | 18                  |
| Carbon coated MoO <sub>2</sub> nanobelts       | 100                       | 30                        | 617.2                        | 19                  |
| rGO wrapped MoO <sub>2</sub> porous nanobelts  | 5000                      | 1900                      | 420                          | 20                  |
| MoO <sub>2</sub> /C nanosheets                 | 500                       | 100                       | 1051                         | 21                  |
| <b>3D C/MoO<sub>2+δ</sub> networks</b>         | <b>200</b><br><b>2000</b> | <b>250</b><br><b>1000</b> | <b>876.9</b><br><b>447.9</b> | <b>Current work</b> |

The references are from the main text.
